# Supplementary material for: In Vitro and In Vivo Human Body Odor Analysis Method Using GO:PANI/ZNRs/ZIF−8 Adsorbent Followed by GC/MS
Source: MDPI journal article supplement (doi:10.3390/molecules27154795), 2022-07-27
Supplement: s1 [file s1]

### **Supplementary materials for**

**In-Vitro and In-Vivo Human Body Odor Analysis Method using GO;PANI/ZNRs/ZIF-8 adsorbent followed by GC/MS**

Sehyun Kim, Sunyoung Bae\*

Department of Chemistry, Seoul Women's University, 621 Hwarang-ro, Nowon-gu, Seoul 01797, Republic of Korea

\*Corresponding Author

Email: sbac@swu.ac.kr

## **S1. Experimental**

### **Chemicals and Instrumentation**

Sulfuric acid (Samchun, Seoul, Korea, 95.0%), sodium nitrate (Sigma-Aldrich, St. Louis, Missouri, USA, >99.0%), potassium permanganate (Samchun, Seoul, Korea, 99.3%), hydrogen peroxide (Daejung, Gyeonggi-do, Korea, 30%), hydrochloric acid (Samchun, Seoul, Korea, 35.0 ~ 37.0%) were used to oxidize natural graphite powder (30  $\mu$ m, 99.9%) from US Research Nanomaterials, Inc (Houston, USA). Aniline (>99.5%), zinc nitrate hexahydrate (98%), hexamethylenetetramine (99%), 2-methyl imidazole (99%), and N,N-dimethylformamide (>99.8%) were purchased from Sigma-Aldrich (St. Louis, Missouri, USA) to make GO;PANI/ZNRs/ZIF-8 coating layer on stainless steel wire



**Table S1.** Physicochemical properties of target compounds

| Compound                       | Structure                                                                           | Molecular weight (g/mol) | Boiling point (°C) | logP <sub>o/w</sub> |
|--------------------------------|-------------------------------------------------------------------------------------|--------------------------|--------------------|---------------------|
| <i>trans</i> -2-Nonenal        | 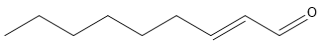   | 140.23                   | 188~190            | 3.06                |
| Benzothiazole                  |    | 135.19                   | 227~228            | 2.01                |
| Isopropyl palmitate            |    | 298.5                    | 160                | 7.17                |
| $\alpha$ -Hexyl cinnamaldehyde |   | 216.32                   | 174~176            | 4.70                |
| Hexyl salicylate               |  | 222.28                   | 290                | 5.06                |



### Optimization using response surface methodology (RSM)

**Table S2.** Experimental design matrix for optimization of reactants concentration in fabrication of adsorbent

| Run | Coded factor |         |      |
|-----|--------------|---------|------|
|     | GO           | Aniline | 2-MI |
| 1   | -1           | 0       | 1    |
| 2   | 0            | 0       | 1    |
| 3   | 1            | 0       | 1    |
| 4   | -1           | -1      | 1    |
| 5   | -1           | 1       | 1    |
| 6   | -1           | 1       | -1   |
| 7   | -1           | 0       | 0    |
| 8   | -1           | 1       | -1   |
| 9   | -1           | 1       | -1   |
| 10  | -1           | 1       | -1   |
| 11  | -1           | 1       | -1   |
| 12  | 1            | 0       | 1    |
| 13  | 0            | 0       | 0    |
| 14  | 0            | 1       | 1    |
| 15  | -1           | -1      | -1   |
| 16  | 1            | 1       | -1   |
| 17  | -1           | -1      | 0    |



**Table S3.** Experimental design matrix for optimization of HS-INME condition

| Run | Coded factor     |                 |                 |
|-----|------------------|-----------------|-----------------|
|     | Extraction temp. | Adsorption time | Desorption time |
| 1   | -1               | 0               | 1               |
| 2   | 0                | 0               | 1               |
| 3   | 1                | 0               | 1               |
| 4   | -1               | -1              | 1               |
| 5   | -1               | 1               | 1               |
| 6   | -1               | 1               | -1              |
| 7   | -1               | 0               | 0               |
| 8   | -1               | 1               | -1              |
| 9   | -1               | 1               | -1              |
| 10  | -1               | 1               | -1              |
| 11  | -1               | 1               | -1              |
| 12  | 1                | 0               | 1               |
| 13  | 0                | 0               | 0               |
| 14  | 0                | 1               | 1               |
| 15  | -1               | -1              | -1              |
| 16  | 1                | 1               | -1              |
| 17  | -1               | -1              | 0               |



## S2. Optimization of body odor adsorbent fabrication conditions using RSM

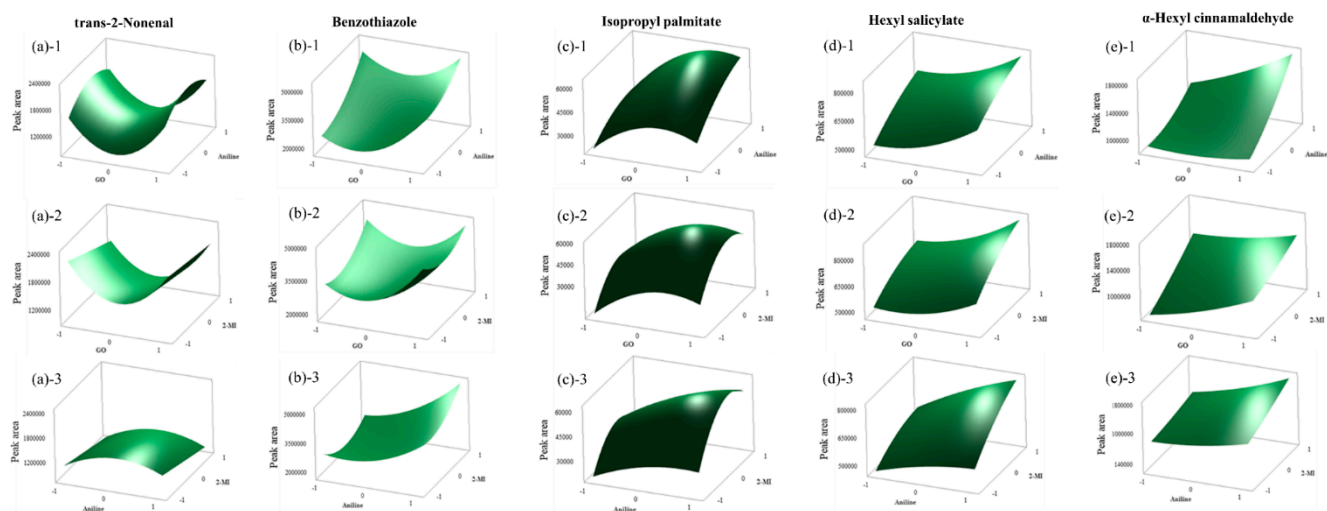

**Figure S1.** Response surface diagrams of target compounds by factors; (a) *trans*-2-nonenal, (b) benzothiazole, (c) isopropyl palmitate, (d) hexyl salicylate, (e)  $\alpha$ -hexyl cinnamaldehyde, and correlation between 1: amount of GO and amount of aniline, 2: amount of GO and amount of 2-MI, and 3: amount of aniline and amount of 2-MI.



### S3. Optimization of INME extraction conditions using RSM

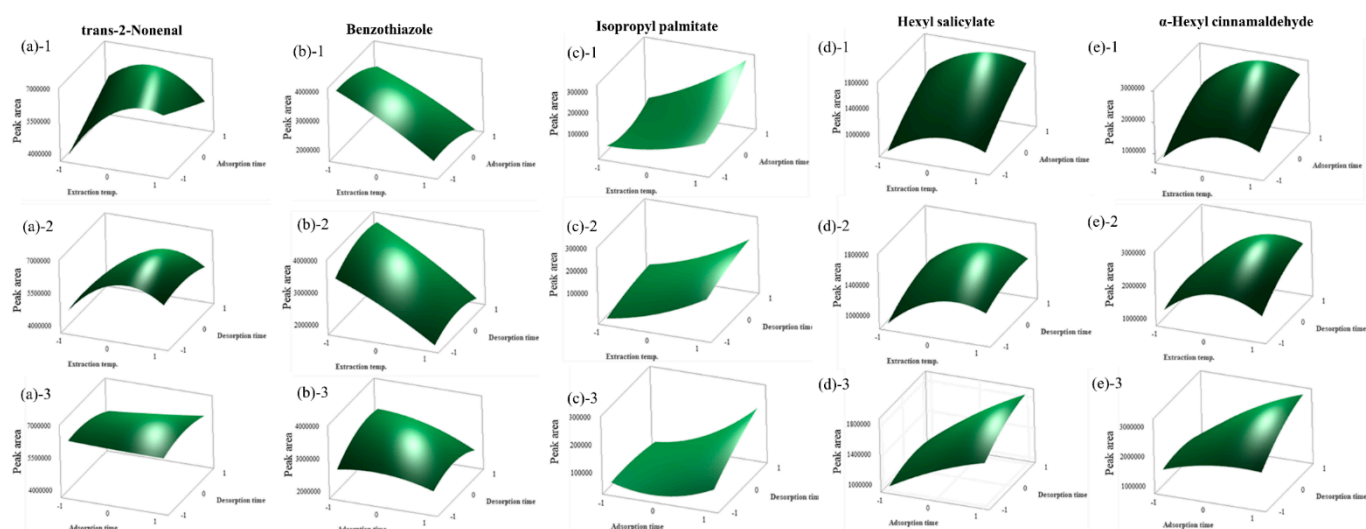

**Figure S2.** Response surface diagrams of target compounds by factors; (a) *trans*-2-nonenal, (b) benzothiazole, (c) isopropyl palmitate, (d) hexyl salicylate, (e)  $\alpha$ -hexyl cinnamaldehyde and correlation between 1: extraction temp. and adsorption time, 2: extraction temp. and desorption time, and 3: adsorption time and desorption time.



#### S4. Characterization of the adsorbent

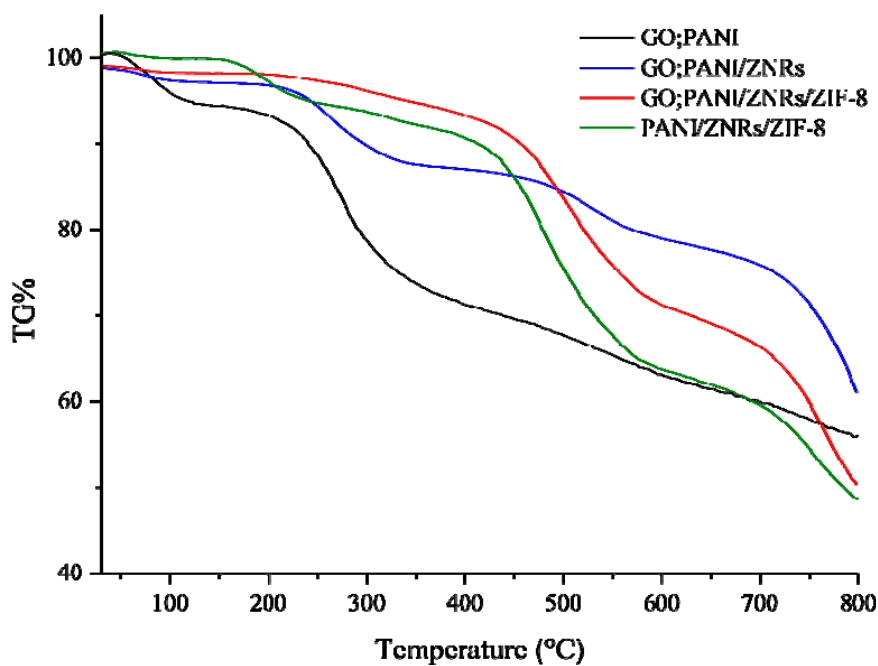

**Figure S3.** TGA curves of GO;PANI, GO;PANI/ZNRs, GO;PANI/ZNRs/ZIF-8, and PANI/ZNRs/ZIF-8.

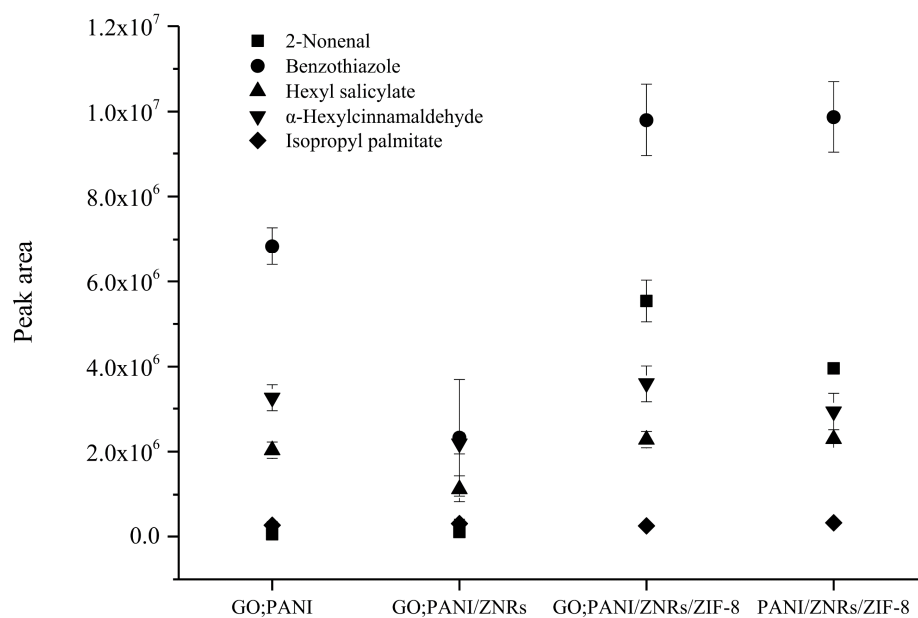

**Figure S4.** Comparison of adsorption amount of five target compounds according to the adsorbent synthesis steps, and without GO.
